# Supplementary material for: Light-induced synthesis of triazine N-oxide-based cross-linked polymers for effective photocatalytic degradation of methyl orange
Source: Royal Society of Chemistry journal article supplement (doi:10.1039/c6ra25532a), 2017-01-01
Supplement: c6ra25532a1.pdf [file c6ra25532a1.pdf]

Electronic Supplementary Material (ESI) for RSC Advances.

This journal is © The Royal Society of Chemistry 2017

Supporting information for

**Light-induced synthesis of triazine N-oxide-based cross-linked polymers  
for effective photocatalytic degradation of methyl orange**

Yangxue Li,<sup>\*a</sup> Wei Zhang,<sup>b</sup> Jian Wang,<sup>d</sup> Haojie Lu,<sup>a</sup> Yu Liu,<sup>d</sup> Zhi Liu,<sup>c</sup> Zhigang Xie<sup>b</sup>

<sup>a</sup> *College of Environment and Resources, Jilin University, Changchun 130026, P. R. China.*

<sup>b</sup> *State Key Laboratory of Polymer Physics and Chemistry, Changchun Institute of Applied Chemistry,  
Chinese Academy of Sciences, 5625 Renmin Street, Changchun 130022, P. R. China*

<sup>c</sup> *Jilin Province Shun Food Technology Services Limited Liability Company, Changchun 13000, P. R.  
China*

<sup>d</sup> *State Key Laboratory of Theoretical and Computational Chemistry, Institute of Theoretical Chemistry,  
Jilin University, Changchun 130023, P. R. China*

Contents

1. Characterization figure
2. TGA curves
3. FTIR spectra
4. SEM and TEM images
5. Photo images
6. HOMO-LUMO calculation
7. References

## 1. Characterization figure

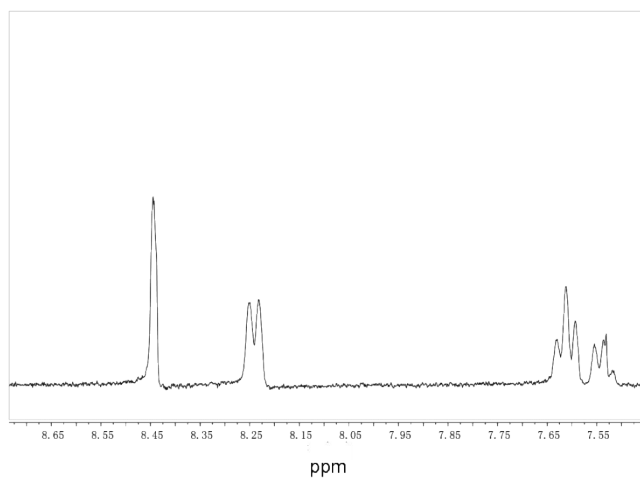

Figure S1. <sup>1</sup>H NMR spectrum for BPTB.

## 2. TGA curves

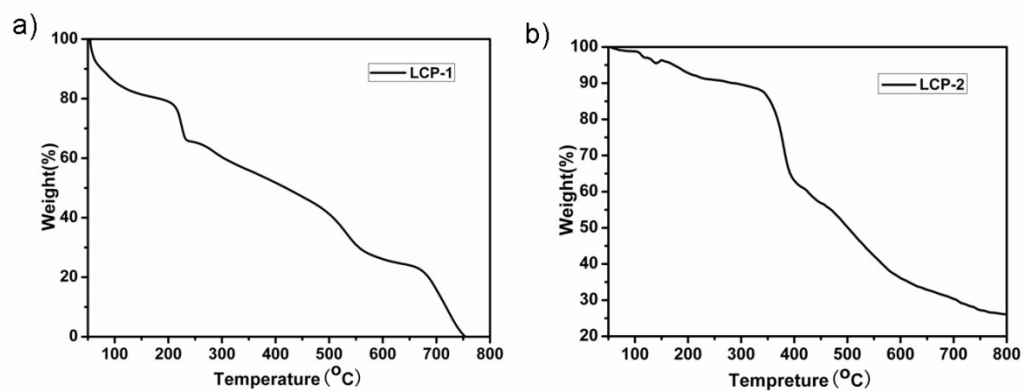

Figure S2. TGA curves of LCP-1(a) and LCP-2 (b).

## 3. FTIR spectra

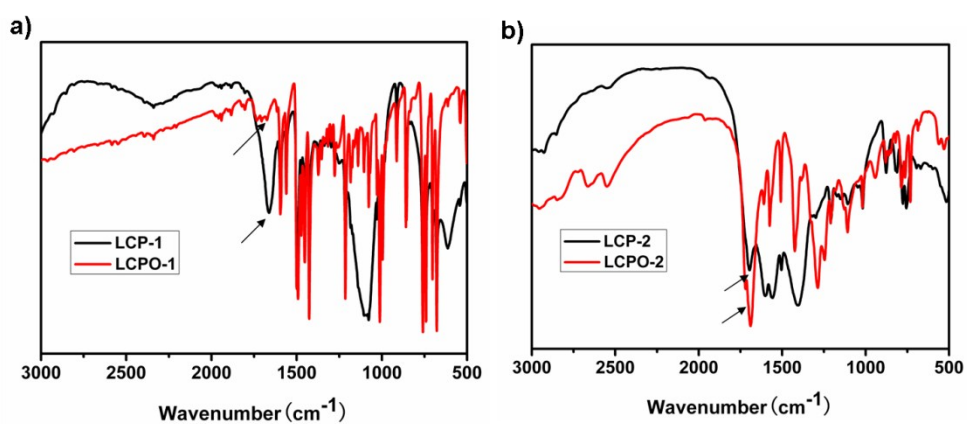

Figure S3. FT-IR spectra of LCP-1(a) and LCP-2 (b).

#### 4. SEM and TEM images

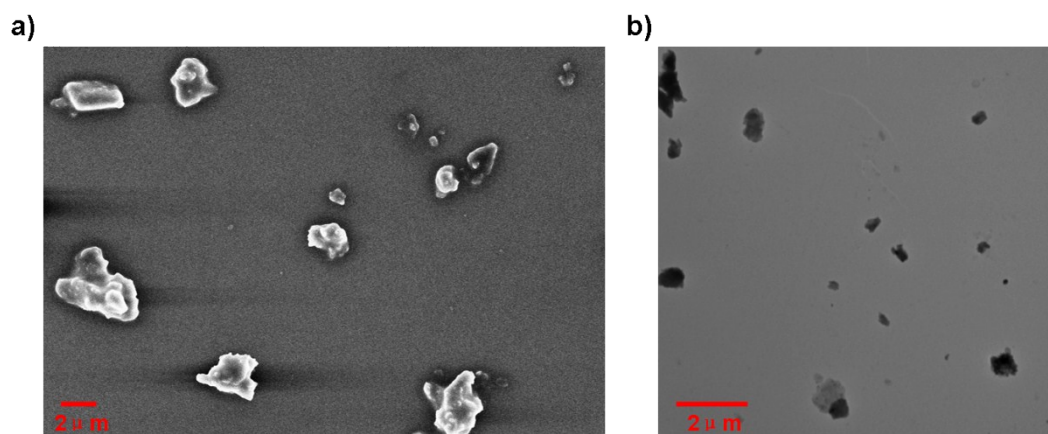

Figure S4. SEM image (a) and TEM image (b) of LCPO-1.

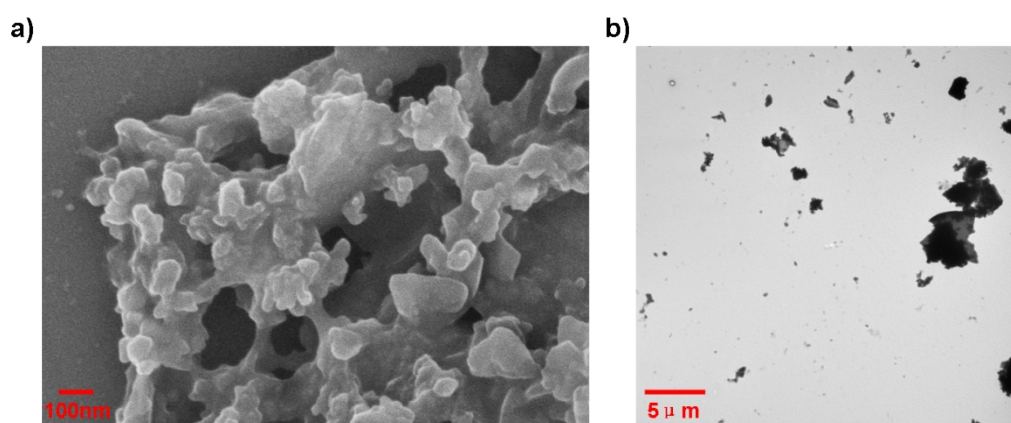

Figure S5. SEM image (a) and TEM image (b) of LCPO-2.

#### 5. Photo images

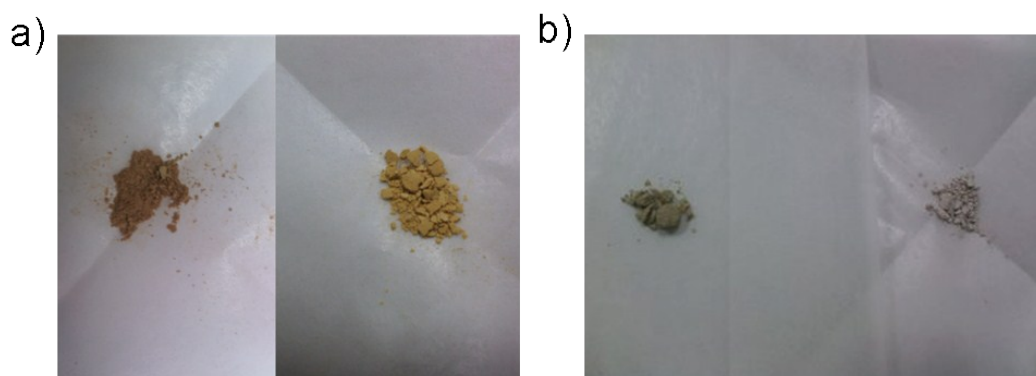

Figure S6. Photo images of LCP and LCPO polymers. (a) LCP-1 (left) and LCPO-1 (right); (b) LCP-2 (left) and LCPO-2 (right).

## 6. HOMO-LUMO calculation

Computational details: Density functional theory (DFT) calculations have been performed with Gaussian09<sup>S1</sup> suite of program with a tight self-consistent field convergence threshold at B3LYP/6-31G(d) level of theory in gas phase,<sup>S2, S3</sup> which has been reported as good balance between accuracy and computational efficiency.<sup>S4, S5</sup> The crystal structure coordinates are used as the initial configuration to complete the geometry optimization calculation. As the large size and complexity in spatial conformation, symmetry constraints are switched off in all calculations. Visualization of the optimized geometrical structures and frontier molecular orbitals are performed by GaussView version 5.0.9.

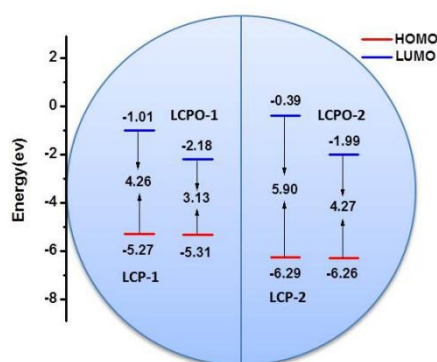

Figure S7. Frontier molecular orbital energy level diagrams for LCP polymers and LCPO polymers.

The final coordinates are extracted from G09 output files with open Babel application, and presented here in xyz format.

Ground state geometry for LCP-1, B3LYP/6-31G(d) level of theory.

234

LCP-1.log Energy: -4007442.0661778

|   |          |          |          |
|---|----------|----------|----------|
| C | -0.27983 | -0.23808 | -0.88379 |
| N | 0.58364  | 0.71710  | -1.23641 |
| C | 0.26824  | 1.92339  | -0.75596 |
| C | -1.55979 | 1.18667  | 0.27678  |
| N | -1.36970 | -0.07966 | -0.12745 |
| N | -0.78602 | 2.23212  | 0.00638  |
| O | -2.62722 | 1.46846  | 1.03252  |
| O | 0.02082  | -1.45109 | -1.35142 |
| O | 1.06424  | 2.95610  | -1.03559 |
| C | -3.48629 | 0.36824  | 1.43201  |
| C | -4.69855 | 0.90921  | 2.10693  |
| H | -2.91766 | -0.30176 | 2.08377  |
| H | -3.78219 | -0.19123 | 0.54272  |
| C | -5.95468 | 1.11931  | 1.57732  |
| N | -4.79478 | 1.20592  | 3.44885  |
| C | -6.76741 | 1.53595  | 2.66195  |

|   |           |         |          |
|---|-----------|---------|----------|
| H | -6.23592  | 0.97797 | 0.54378  |
| N | -6.04939  | 1.57774 | 3.79069  |
| C | -8.19357  | 1.89259 | 2.66370  |
| C | -8.96240  | 1.82189 | 1.49249  |
| C | -8.82790  | 2.31279 | 3.84668  |
| C | -10.31330 | 2.15453 | 1.50067  |
| H | -8.50525  | 1.50137 | 0.56057  |
| C | -10.17506 | 2.64496 | 3.85489  |
| H | -8.24413  | 2.37710 | 4.75898  |
| C | -10.94650 | 2.57143 | 2.68107  |
| H | -10.88002 | 2.08328 | 0.57685  |
| H | -10.65151 | 2.97054 | 4.77369  |
| C | -12.37447 | 2.92082 | 2.69694  |
| C | -13.28611 | 2.97600 | 1.60859  |
| N | -12.98297 | 3.24936 | 3.83986  |
| C | -14.49098 | 3.35353 | 2.15620  |
| H | -13.11335 | 2.74839 | 0.56822  |
| N | -14.27149 | 3.51807 | 3.50518  |
| C | -15.82374 | 3.52659 | 1.49457  |
| C | -15.19109 | 3.85397 | 4.53575  |
| O | -15.77764 | 2.75734 | 0.28069  |
| H | -16.03736 | 4.57131 | 1.24102  |
| H | -16.64421 | 3.17664 | 2.12933  |
| C | -16.18015 | 4.82157 | 4.33059  |
| C | -15.08111 | 3.21221 | 5.77562  |
| C | -16.84588 | 2.80810 | -0.52146 |
| C | -17.07798 | 5.12059 | 5.35646  |
| H | -16.23261 | 5.36219 | 3.39167  |
| C | -15.97161 | 3.53194 | 6.79690  |
| H | -14.29630 | 2.47879 | 5.91882  |
| N | -17.89639 | 3.54251 | -0.14766 |
| N | -16.72193 | 2.08931 | -1.63950 |
| C | -16.97854 | 4.47906 | 6.59068  |
| H | -17.84523 | 5.87134 | 5.18960  |
| H | -15.88298 | 3.03135 | 7.75713  |
| C | -18.90254 | 3.51258 | -1.02732 |
| C | -17.79775 | 2.14792 | -2.42063 |
| H | -17.67517 | 4.71927 | 7.38877  |
| N | -18.92506 | 2.83714 | -2.17879 |
| O | -19.96249 | 4.24010 | -0.67442 |
| O | -17.70708 | 1.43619 | -3.54412 |
| C | -21.09437 | 4.27301 | -1.57661 |
| C | -18.82571 | 1.46023 | -4.46113 |
| C | -22.09714 | 5.22348 | -1.00023 |

|   |           |          |          |
|---|-----------|----------|----------|
| H | -21.50521 | 3.26471  | -1.68851 |
| H | -20.74316 | 4.60377  | -2.56129 |
| C | -18.43507 | 0.65610  | -5.66224 |
| H | -19.03598 | 2.50367  | -4.72550 |
| H | -19.71539 | 1.05298  | -3.97053 |
| C | -23.37579 | 4.91298  | -0.79275 |
| H | -21.72719 | 6.22328  | -0.77753 |
| C | -19.17659 | -0.33054 | -6.16323 |
| H | -17.49939 | 0.94366  | -6.13935 |
| H | -24.08556 | 5.64173  | -0.41182 |
| H | -23.76494 | 3.91840  | -1.00077 |
| H | -20.10978 | -0.63912 | -5.69643 |
| H | -18.88300 | -0.86587 | -7.06163 |
| C | 2.21684   | 2.69928  | -1.87653 |
| C | 2.94655   | 3.98545  | -2.06605 |
| H | 1.87414   | 2.24769  | -2.80974 |
| H | 2.87375   | 1.97736  | -1.38518 |
| C | 4.17899   | 4.35727  | -1.57244 |
| N | 2.46085   | 5.07829  | -2.74537 |
| C | 4.37143   | 5.70087  | -1.98683 |
| H | 4.83909   | 3.73509  | -0.98543 |
| N | 3.31479   | 6.12701  | -2.68835 |
| C | 1.20260   | 5.25054  | -3.39491 |
| C | 5.52111   | 6.58532  | -1.74705 |
| C | 0.42781   | 6.37060  | -3.08100 |
| C | 0.76479   | 4.33177  | -4.35208 |
| C | 6.59770   | 6.17800  | -0.94525 |
| C | 5.57164   | 7.86921  | -2.31931 |
| C | -0.79724  | 6.55782  | -3.71718 |
| H | 0.79556   | 7.07719  | -2.34553 |
| C | -0.47090  | 4.52014  | -4.97221 |
| H | 1.39636   | 3.49501  | -4.63200 |
| C | 7.68433   | 7.01820  | -0.72383 |
| H | 6.59014   | 5.19415  | -0.48458 |
| C | 6.65506   | 8.70750  | -2.09801 |
| H | 4.74537   | 8.19692  | -2.94154 |
| C | -1.25450  | 5.63066  | -4.65683 |
| H | -1.40050  | 7.42699  | -3.47066 |
| H | -0.81030  | 3.80418  | -5.71554 |
| C | 7.73557   | 8.29806  | -1.29597 |
| H | 8.50348   | 6.66876  | -0.10193 |
| H | 6.68077   | 9.69590  | -2.54487 |
| H | -2.21386  | 5.77719  | -5.14505 |
| C | 8.88474   | 9.18702  | -1.07055 |

|   |          |          |          |
|---|----------|----------|----------|
| C | 10.00482 | 8.98868  | -0.21940 |
| N | 8.97409  | 10.36059 | -1.70228 |
| C | 10.78823 | 10.10985 | -0.37332 |
| H | 10.23665 | 8.14125  | 0.40678  |
| N | 10.13268 | 10.92254 | -1.27039 |
| C | 12.11701 | 10.43335 | 0.23758  |
| C | 10.53172 | 12.17427 | -1.81342 |
| O | 12.71030 | 9.17722  | 0.61231  |
| H | 12.03076 | 11.06055 | 1.13237  |
| H | 12.77232 | 10.96155 | -0.46211 |
| C | 11.15060 | 13.14085 | -1.01389 |
| C | 10.27923 | 12.43617 | -3.16574 |
| C | 13.90000 | 9.22084  | 1.22044  |
| C | 11.54636 | 14.35452 | -1.57810 |
| H | 11.29544 | 12.96504 | 0.04664  |
| C | 10.66282 | 13.65763 | -3.71271 |
| H | 9.78212  | 11.68048 | -3.76254 |
| N | 14.47838 | 10.39726 | 1.43237  |
| N | 14.38227 | 8.01449  | 1.55422  |
| C | 11.30545 | 14.61777 | -2.92620 |
| H | 12.02919 | 15.09959 | -0.95215 |
| H | 10.46568 | 13.85656 | -4.76250 |
| C | 15.67191 | 10.29977 | 2.04421  |
| C | 15.57049 | 8.06977  | 2.15017  |
| H | 11.60916 | 15.56607 | -3.36028 |
| N | 16.27584 | 9.17935  | 2.42622  |
| O | 16.26516 | 11.47259 | 2.26228  |
| O | 16.16387 | 6.94027  | 2.53296  |
| C | 17.55232 | 11.45994 | 2.92848  |
| C | 15.47826 | 5.69350  | 2.25606  |
| C | 17.96913 | 12.88481 | 3.12000  |
| H | 18.27233 | 10.89899 | 2.32512  |
| H | 17.44063 | 10.93679 | 3.88544  |
| C | 16.37835 | 4.58222  | 2.69806  |
| H | 15.27039 | 5.64557  | 1.18073  |
| H | 14.51853 | 5.67790  | 2.78140  |
| C | 19.15281 | 13.36562 | 2.74277  |
| H | 17.24825 | 13.52502 | 3.62669  |
| C | 15.99352 | 3.59750  | 3.50849  |
| H | 17.38732 | 4.59903  | 2.28831  |
| H | 19.43929 | 14.39520 | 2.93771  |
| H | 19.88535 | 12.74591 | 2.22977  |
| H | 14.99266 | 3.56438  | 3.93393  |
| H | 16.66083 | 2.78219  | 3.77307  |

|   |          |           |          |
|---|----------|-----------|----------|
| C | -0.87846 | -2.54057  | -1.02710 |
| C | -0.36516 | -3.77245  | -1.69108 |
| H | -1.88766 | -2.26417  | -1.33827 |
| H | -0.89360 | -2.68967  | 0.05562  |
| C | 0.24492  | -4.86946  | -1.12108 |
| N | -0.34651 | -3.98669  | -3.04983 |
| C | 0.61960  | -5.70856  | -2.20287 |
| H | 0.40402  | -5.02711  | -0.06407 |
| N | 0.26236  | -5.15336  | -3.36669 |
| C | -0.79596 | -3.13805  | -4.10408 |
| C | 1.29740  | -7.01275  | -2.16829 |
| C | 0.07368  | -2.85498  | -5.16121 |
| C | -2.09560 | -2.62475  | -4.09985 |
| C | 1.73041  | -7.57596  | -0.95876 |
| C | 1.53193  | -7.73152  | -3.35433 |
| C | -0.35740 | -2.04001  | -6.20560 |
| H | 1.07106  | -3.27992  | -5.15114 |
| C | -2.51243 | -1.79610  | -5.14231 |
| H | -2.78579 | -2.89843  | -3.30847 |
| C | 2.37407  | -8.80925  | -0.93249 |
| H | 1.56712  | -7.04763  | -0.02365 |
| C | 2.17436  | -8.96107  | -3.32827 |
| H | 1.20114  | -7.30813  | -4.29699 |
| C | -1.64627 | -1.50080  | -6.19562 |
| H | 0.31908  | -1.82080  | -7.02695 |
| H | -3.52349 | -1.39863  | -5.13790 |
| C | 2.60912  | -9.52562  | -2.11551 |
| H | 2.69328  | -9.21774  | 0.02193  |
| H | 2.35119  | -9.50438  | -4.25062 |
| H | -1.97664 | -0.86184  | -7.00971 |
| C | 3.28989  | -10.82851 | -2.09468 |
| C | 3.86220  | -11.51274 | -0.98895 |
| N | 3.44645  | -11.53328 | -3.21867 |
| C | 4.37405  | -12.68185 | -1.50411 |
| H | 3.88355  | -11.22235 | 0.04993  |
| N | 4.11269  | -12.65950 | -2.85553 |
| C | 5.05276  | -13.81500 | -0.79758 |
| C | 4.38529  | -13.64270 | -3.84546 |
| O | 4.64026  | -13.74254 | 0.57788  |
| H | 6.14563  | -13.74557 | -0.84124 |
| H | 4.77584  | -14.78609 | -1.22058 |
| C | 5.58939  | -14.35454 | -3.84131 |
| C | 3.43278  | -13.87737 | -4.84485 |
| C | 5.18917  | -14.61259 | 1.43190  |



|   |          |           |          |
|---|----------|-----------|----------|
| C | 5.82318  | -15.32327 | -4.81859 |
| H | 6.35389  | -14.13568 | -3.10358 |
| C | 3.68521  | -14.83385 | -5.82450 |
| H | 2.51435  | -13.30228 | -4.83963 |
| N | 6.06584  | -15.50513 | 0.96563  |
| N | 4.77492  | -14.47292 | 2.69309  |
| C | 4.87514  | -15.56685 | -5.81185 |
| H | 6.75946  | -15.87406 | -4.80803 |
| H | 2.94321  | -15.01319 | -6.59766 |
| C | 6.54481  | -16.31979 | 1.91120  |
| C | 5.32889  | -15.35094 | 3.52578  |
| H | 5.06354  | -16.31695 | -6.57460 |
| N | 6.22090  | -16.30315 | 3.20633  |
| O | 7.42435  | -17.21826 | 1.46801  |
| O | 4.93027  | -15.24134 | 4.79296  |
| C | 8.00664  | -18.13002 | 2.43023  |
| C | 5.49802  | -16.14545 | 5.76933  |
| C | 9.01427  | -18.96443 | 1.70252  |
| H | 7.21943  | -18.74246 | 2.88092  |
| H | 8.47134  | -17.53967 | 3.22896  |
| C | 4.93866  | -15.76683 | 7.10556  |
| H | 6.58965  | -16.04193 | 5.74490  |
| H | 5.25346  | -17.17864 | 5.50349  |
| C | 9.03322  | -20.29594 | 1.73631  |
| H | 9.77409  | -18.41372 | 1.14987  |
| C | 4.36260  | -16.63295 | 7.93759  |
| H | 5.05368  | -14.72109 | 7.38675  |
| H | 9.80541  | -20.86889 | 1.23094  |
| H | 8.27973  | -20.86599 | 2.27593  |
| H | 4.22982  | -17.68002 | 7.67310  |
| H | 4.00506  | -16.33106 | 8.91787  |
| C | -3.80414 | 1.11013   | 4.46841  |
| C | -4.17166 | 0.59379   | 5.71658  |
| C | -2.49526 | 1.54528   | 4.23697  |
| C | -3.21895 | 0.50177   | 6.72794  |
| H | -5.19702 | 0.28074   | 5.87649  |
| C | -1.54711 | 1.43176   | 5.25534  |
| H | -2.23077 | 1.99152   | 3.28483  |
| C | -1.90249 | 0.91183   | 6.49997  |
| H | -3.50567 | 0.10183   | 7.69663  |
| H | -0.53140 | 1.77248   | 5.07484  |
| H | -1.16195 | 0.83415   | 7.29105  |

Ground state geometry for LCPO-1, B3LYP/6-31G(d) level of theory.

LCPO-1.log Energy: -4148869.6005839

|   |           |          |          |
|---|-----------|----------|----------|
| C | 0.83221   | -2.08537 | -1.63432 |
| N | 0.76807   | -0.85148 | -1.01720 |
| C | -0.46640  | -0.29910 | -0.74202 |
| C | -1.54374  | -2.20433 | -1.67877 |
| N | -0.31847  | -2.73593 | -1.99800 |
| N | -1.60932  | -0.99343 | -1.03985 |
| O | -2.62715  | -2.90304 | -1.93251 |
| O | 2.02137   | -2.52036 | -1.98167 |
| O | -0.48893  | 0.83099  | -0.07421 |
| C | -3.59338  | -2.33190 | -2.91355 |
| C | -4.80852  | -3.17517 | -2.93920 |
| H | -3.08427  | -2.30385 | -3.87982 |
| H | -3.83476  | -1.32764 | -2.56821 |
| C | -5.97393  | -3.02026 | -2.21542 |
| N | -5.01322  | -4.25250 | -3.77492 |
| C | -6.84904  | -4.03486 | -2.67484 |
| H | -6.15306  | -2.26327 | -1.46572 |
| N | -6.25162  | -4.76741 | -3.62460 |
| C | -8.22401  | -4.33366 | -2.24925 |
| C | -8.85702  | -3.57773 | -1.25146 |
| C | -8.94401  | -5.38926 | -2.83707 |
| C | -10.16029 | -3.86208 | -0.85626 |
| H | -8.33008  | -2.75576 | -0.77514 |
| C | -10.24368 | -5.67295 | -2.44274 |
| H | -8.46529  | -5.98506 | -3.60719 |
| C | -10.87955 | -4.91346 | -1.44420 |
| H | -10.62173 | -3.25443 | -0.08336 |
| H | -10.78747 | -6.49176 | -2.90205 |
| C | -12.25820 | -5.21613 | -1.03316 |
| C | -13.03229 | -4.60611 | -0.01008 |
| N | -12.95467 | -6.18039 | -1.64146 |
| C | -14.24720 | -5.25240 | -0.03272 |
| H | -12.76852 | -3.78846 | 0.64247  |
| N | -14.16434 | -6.20308 | -1.02496 |
| C | -15.47329 | -4.99931 | 0.78989  |
| C | -15.15563 | -7.10810 | -1.49308 |
| O | -15.37455 | -3.64389 | 1.25895  |
| H | -15.54679 | -5.66725 | 1.65571  |
| H | -16.39098 | -5.12773 | 0.20675  |
| C | -16.01590 | -7.75678 | -0.60105 |
| C | -15.24950 | -7.35696 | -2.86797 |
| C | -16.32452 | -3.20929 | 2.09345  |

|   |           |          |          |
|---|-----------|----------|----------|
| C | -16.99065 | -8.62761 | -1.09040 |
| H | -15.90905 | -7.61100 | 0.46850  |
| C | -16.21451 | -8.24135 | -3.34232 |
| H | -14.56169 | -6.85704 | -3.53977 |
| N | -17.31533 | -4.03926 | 2.42831  |
| N | -16.15489 | -1.95009 | 2.50239  |
| C | -17.09458 | -8.87303 | -2.45922 |
| H | -17.65724 | -9.12609 | -0.39235 |
| H | -16.28452 | -8.43103 | -4.40984 |
| C | -18.20311 | -3.49224 | 3.26494  |
| C | -17.11266 | -1.53478 | 3.32782  |
| H | -17.85043 | -9.55627 | -2.83578 |
| N | -18.16759 | -2.24982 | 3.75242  |
| O | -19.20166 | -4.30377 | 3.61394  |
| O | -16.97469 | -0.27828 | 3.75034  |
| C | -20.20187 | -3.79422 | 4.52824  |
| C | -17.96151 | 0.24680  | 4.66887  |
| C | -21.15216 | -4.91350 | 4.82033  |
| H | -20.70922 | -2.93552 | 4.07763  |
| H | -19.69530 | -3.44643 | 5.43647  |
| C | -17.53505 | 1.63437  | 5.03545  |
| H | -18.00121 | -0.40848 | 5.54753  |
| H | -18.94929 | 0.23521  | 4.19760  |
| C | -22.47414 | -4.81272 | 4.69110  |
| H | -20.70011 | -5.83540 | 5.18335  |
| C | -18.33237 | 2.69828  | 4.95384  |
| H | -16.51762 | 1.73191  | 5.41117  |
| H | -23.13745 | -5.63208 | 4.95303  |
| H | -22.94607 | -3.90396 | 4.32327  |
| H | -19.34909 | 2.62473  | 4.57323  |
| H | -18.00225 | 3.68417  | 5.26837  |
| C | -1.21842  | 1.97720  | -0.64590 |
| C | -1.02884  | 3.16003  | 0.23341  |
| H | -2.25642  | 1.67173  | -0.77419 |
| H | -0.78180  | 2.19914  | -1.62339 |
| C | -0.50791  | 4.38137  | -0.13820 |
| N | -1.37116  | 3.27151  | 1.56456  |
| C | -0.55997  | 5.19336  | 1.02287  |
| H | -0.14168  | 4.63886  | -1.12155 |
| N | -1.07168  | 4.50196  | 2.04502  |
| C | -1.84999  | 2.29258  | 2.48880  |
| C | -0.14484  | 6.59335  | 1.19019  |
| C | -1.39350  | 2.34874  | 3.81130  |
| C | -2.76899  | 1.31348  | 2.10318  |

|   |          |          |          |
|---|----------|----------|----------|
| C | 0.49108  | 7.29128  | 0.15279  |
| C | -0.37346 | 7.27085  | 2.40135  |
| C | -1.85589 | 1.41964  | 4.73987  |
| H | -0.68840 | 3.12138  | 4.09257  |
| C | -3.21103 | 0.37839  | 3.03938  |
| H | -3.14645 | 1.26384  | 1.09075  |
| C | 0.88536  | 8.61524  | 0.31694  |
| H | 0.68791  | 6.79713  | -0.79447 |
| C | 0.02068  | 8.59105  | 2.56539  |
| H | -0.86620 | 6.74346  | 3.21153  |
| C | -2.76163 | 0.42701  | 4.35874  |
| H | -1.49786 | 1.46853  | 5.76457  |
| H | -3.91832 | -0.38453 | 2.72707  |
| C | 0.65856  | 9.29092  | 1.52532  |
| H | 1.37350  | 9.12682  | -0.50740 |
| H | -0.15942 | 9.10201  | 3.50543  |
| H | -3.11428 | -0.30056 | 5.08438  |
| C | 1.07422  | 10.68963 | 1.70438  |
| C | 1.79322  | 11.52219 | 0.80537  |
| N | 0.79118  | 11.34620 | 2.83287  |
| C | 1.92898  | 12.73017 | 1.45072  |
| H | 2.14681  | 11.29798 | -0.18907 |
| N | 1.31869  | 12.58768 | 2.67652  |
| C | 2.55806  | 14.00084 | 0.96728  |
| C | 1.13557  | 13.54571 | 3.71061  |
| O | 2.54919  | 13.93761 | -0.46913 |
| H | 3.59343  | 14.11598 | 1.30801  |
| H | 2.00849  | 14.88467 | 1.30677  |
| C | 2.15119  | 14.44842 | 4.04251  |
| C | -0.07729 | 13.56262 | 4.41046  |
| C | 3.12379  | 14.94530 | -1.13375 |
| C | 1.93821  | 15.38812 | 5.05223  |
| H | 3.11215  | 14.40138 | 3.54160  |
| C | -0.27113 | 14.49337 | 5.42758  |
| H | -0.84418 | 12.84303 | 4.14893  |
| N | 3.65210  | 15.95560 | -0.43882 |
| N | 3.09504  | 14.80838 | -2.46122 |
| C | 0.72955  | 15.41519 | 5.74734  |
| H | 2.73034  | 16.08787 | 5.30320  |
| H | -1.21378 | 14.50349 | 5.96776  |
| C | 4.19289  | 16.90309 | -1.21144 |
| C | 3.66566  | 15.82427 | -3.10415 |
| H | 0.56970  | 16.14375 | 6.53702  |
| N | 4.23339  | 16.90617 | -2.54596 |

|   |         |          |          |
|---|---------|----------|----------|
| O | 4.72774 | 17.92187 | -0.53801 |
| O | 3.64916 | 15.71934 | -4.43286 |
| C | 5.34715 | 18.98736 | -1.29768 |
| C | 4.26800 | 16.77109 | -5.20991 |
| C | 5.94766 | 19.94505 | -0.31615 |
| H | 4.59785 | 19.47054 | -1.93250 |
| H | 6.10940 | 18.54816 | -1.95216 |
| C | 4.17911 | 16.37234 | -6.65033 |
| H | 5.31006 | 16.87619 | -4.88431 |
| H | 3.75961 | 17.72123 | -5.01820 |
| C | 5.70898 | 21.25557 | -0.32202 |
| H | 6.63419 | 19.51056 | 0.40905  |
| C | 3.69094 | 17.16072 | -7.60658 |
| H | 4.57158 | 15.38576 | -6.89215 |
| H | 6.19556 | 21.92758 | 0.37911  |
| H | 5.02096 | 21.70928 | -1.03243 |
| H | 3.28605 | 18.14625 | -7.38572 |
| H | 3.68087 | 16.85452 | -8.64873 |
| C | 2.44899 | -3.86054 | -1.54401 |
| C | 3.83930 | -4.10483 | -2.01068 |
| H | 1.71734 | -4.57741 | -1.91605 |
| H | 2.44372 | -3.87311 | -0.45089 |
| C | 4.91362 | -4.44855 | -1.21791 |
| N | 4.30281 | -4.09208 | -3.31043 |
| C | 6.00600 | -4.63041 | -2.10311 |
| H | 4.89642 | -4.55363 | -0.14267 |
| N | 5.62192 | -4.39748 | -3.36057 |
| C | 3.66700 | -3.69910 | -4.52856 |
| C | 7.38990 | -5.01930 | -1.79659 |
| C | 4.44511 | -3.07293 | -5.51050 |
| C | 2.31079 | -3.94433 | -4.75934 |
| C | 7.83015 | -5.15810 | -0.47197 |
| C | 8.31251 | -5.26258 | -2.82986 |
| C | 3.86039 | -2.69193 | -6.71552 |
| H | 5.49621 | -2.89844 | -5.31688 |
| C | 1.73404 | -3.54166 | -5.96447 |
| H | 1.69227 | -4.43400 | -4.01974 |
| C | 9.14145 | -5.52658 | -0.18843 |
| H | 7.14565 | -4.97207 | 0.35090  |
| C | 9.62041 | -5.62906 | -2.54704 |
| H | 7.98468 | -5.16024 | -3.85906 |
| C | 2.50211 | -2.91889 | -6.94799 |
| H | 4.47079 | -2.20638 | -7.47199 |
| H | 0.67609 | -3.72740 | -6.12840 |

|   |          |          |          |
|---|----------|----------|----------|
| C | 10.06184 | -5.76960 | -1.21889 |
| H | 9.44887  | -5.62726 | 0.84841  |
| H | 10.32273 | -5.81251 | -3.35341 |
| H | 2.04797  | -2.61328 | -7.88645 |
| C | 11.44825 | -6.16105 | -0.92552 |
| C | 12.08770 | -6.28097 | 0.33729  |
| N | 12.29692 | -6.45558 | -1.91430 |
| C | 13.37821 | -6.67228 | 0.06131  |
| H | 11.67326 | -6.13229 | 1.32229  |
| N | 13.47318 | -6.76136 | -1.30905 |
| C | 14.49612 | -6.99720 | 1.00360  |
| C | 14.57362 | -7.16499 | -2.11388 |
| O | 13.88435 | -7.35989 | 2.25421  |
| H | 15.16586 | -6.14665 | 1.17445  |
| H | 15.11400 | -7.82313 | 0.63730  |
| C | 15.87775 | -6.76807 | -1.80035 |
| C | 14.33078 | -7.95562 | -3.24385 |
| C | 14.70174 | -7.63127 | 3.27711  |
| C | 16.94027 | -7.19132 | -2.60031 |
| H | 16.06371 | -6.10874 | -0.95932 |
| C | 15.39721 | -8.35667 | -4.04401 |
| H | 13.31091 | -8.23708 | -3.47835 |
| N | 16.01523 | -7.57011 | 3.09197  |
| N | 14.06215 | -7.94550 | 4.41338  |
| C | 16.70571 | -7.98551 | -3.72231 |
| H | 17.95087 | -6.88169 | -2.34966 |
| H | 15.20488 | -8.97044 | -4.91966 |
| C | 16.72187 | -7.86896 | 4.19642  |
| C | 14.88595 | -8.21978 | 5.42164  |
| H | 17.53443 | -8.30795 | -4.34614 |
| N | 16.22883 | -8.20296 | 5.38436  |
| O | 18.04189 | -7.81168 | 4.02576  |
| O | 14.38032 | -8.54798 | 6.60929  |
| C | 18.88017 | -8.10570 | 5.17124  |
| C | 12.93706 | -8.60626 | 6.73287  |
| C | 20.30060 | -7.89084 | 4.75083  |
| H | 18.70104 | -9.13293 | 5.50283  |
| H | 18.59232 | -7.43638 | 5.99036  |
| C | 12.62680 | -9.06654 | 8.12297  |
| H | 12.55438 | -9.30334 | 5.97823  |
| H | 12.51054 | -7.62088 | 6.52236  |
| C | 21.26460 | -8.79561 | 4.91419  |
| H | 20.52426 | -6.91648 | 4.31854  |
| C | 11.79813 | -8.42494 | 8.94530  |

|   |          |          |          |
|---|----------|----------|----------|
| H | 13.10168 | -9.99703 | 8.43090  |
| H | 22.29454 | -8.58888 | 4.63745  |
| H | 21.06259 | -9.77712 | 5.33799  |
| H | 11.31851 | -7.49084 | 8.66017  |
| H | 11.56110 | -8.81086 | 9.93269  |
| C | -4.15338 | -4.80577 | -4.76936 |
| C | -4.71325 | -5.20861 | -5.98804 |
| C | -2.78564 | -4.96432 | -4.52623 |
| C | -3.89505 | -5.76332 | -6.96852 |
| H | -5.77918 | -5.08925 | -6.14433 |
| C | -1.97664 | -5.50947 | -5.52586 |
| H | -2.34828 | -4.69438 | -3.57160 |
| C | -2.52313 | -5.91025 | -6.74503 |
| H | -4.33126 | -6.07715 | -7.91283 |
| H | -0.91586 | -5.63793 | -5.33045 |
| H | -1.88808 | -6.34244 | -7.51331 |
| O | -2.76652 | -0.50262 | -0.73099 |
| O | 1.83168  | -0.22971 | -0.71352 |
| O | -0.25008 | -3.85949 | -2.62891 |

Ground state geometry for LCP-2, B3LYP/6-31G(d) level of theory.

180

LCP-2.log Energy: -3012916.6086839

|   |          |          |         |
|---|----------|----------|---------|
| C | -0.49391 | -4.20996 | 3.31883 |
| N | -0.35545 | -3.58352 | 2.14041 |
| C | -1.38716 | -3.77078 | 1.31465 |
| C | -2.47921 | -5.05530 | 2.77647 |
| N | -1.52273 | -4.95901 | 3.70496 |
| N | -2.48186 | -4.49378 | 1.56487 |
| O | -1.36826 | -3.19982 | 0.10909 |
| O | 0.47967  | -4.09379 | 4.22456 |
| O | -3.52412 | -5.80060 | 3.14213 |
| C | -4.60715 | -5.95644 | 2.20701 |
| C | -5.65008 | -6.80677 | 2.90827 |
| H | -4.25269 | -6.44986 | 1.29591 |
| H | -5.01096 | -4.97805 | 1.93013 |
| C | -6.56141 | -6.14776 | 3.95836 |
| H | -5.19317 | -7.74665 | 3.24674 |
| O | -6.77421 | -7.05711 | 2.02881 |
| C | -7.72197 | -6.64785 | 3.05397 |
| H | -6.47564 | -5.05855 | 3.99495 |
| H | -6.52129 | -6.55375 | 4.97124 |
| C | -8.75499 | -5.66122 | 2.57711 |

|   |           |          |          |
|---|-----------|----------|----------|
| H | -8.22086  | -7.53131 | 3.47784  |
| C | -9.93892  | -5.48350 | 3.30476  |
| C | -8.54351  | -4.88010 | 1.43624  |
| C | -10.87837 | -4.53393 | 2.91043  |
| H | -10.12340 | -6.08690 | 4.19155  |
| C | -9.49338  | -3.94329 | 1.03020  |
| H | -7.63681  | -5.02715 | 0.85832  |
| C | -10.67084 | -3.75902 | 1.76200  |
| H | -11.78592 | -4.39985 | 3.49597  |
| H | -9.32103  | -3.33214 | 0.15001  |
| C | -11.72654 | -2.78339 | 1.31100  |
| C | -12.75368 | -3.25600 | 0.24304  |
| H | -12.20338 | -2.32274 | 2.18741  |
| O | -11.22807 | -1.75462 | 0.41014  |
| C | -12.22924 | -2.07251 | -0.58888 |
| H | -13.80678 | -3.20613 | 0.53165  |
| H | -12.53643 | -4.23973 | -0.17742 |
| C | -13.16312 | -0.88946 | -0.78028 |
| H | -11.76989 | -2.33946 | -1.54872 |
| O | -14.12708 | -1.29678 | -1.76858 |
| H | -12.61093 | -0.01063 | -1.12786 |
| H | -13.66970 | -0.62361 | 0.15322  |
| C | -15.06698 | -0.42157 | -2.13264 |
| N | -15.07146 | 0.78894  | -1.56899 |
| N | -15.91882 | -0.88402 | -3.05236 |
| C | -16.05539 | 1.57613  | -2.01295 |
| C | -16.84587 | 0.00429  | -3.40060 |
| N | -16.97793 | 1.25259  | -2.92322 |
| O | -16.07841 | 2.79084  | -1.46279 |
| O | -17.71345 | -0.42934 | -4.31658 |
| C | -17.10020 | 3.71620  | -1.90251 |
| C | -18.74197 | 0.48144  | -4.76784 |
| C | -16.84674 | 5.02167  | -1.21463 |
| H | -18.08987 | 3.31459  | -1.66300 |
| H | -17.03294 | 3.81478  | -2.99262 |
| C | -19.51735 | -0.21813 | -5.84089 |
| H | -18.25978 | 1.39067  | -5.14700 |
| H | -19.37991 | 0.76758  | -3.92559 |
| C | -17.77470 | 5.68942  | -0.53098 |
| H | -15.84267 | 5.42797  | -1.32753 |
| C | -20.84500 | -0.32616 | -5.84308 |
| H | -18.92732 | -0.62390 | -6.66135 |
| H | -17.56684 | 6.65577  | -0.08054 |
| H | -18.78133 | 5.29804  | -0.39888 |



|   |           |          |          |
|---|-----------|----------|----------|
| H | -21.45298 | 0.06394  | -5.02935 |
| H | -21.37738 | -0.80458 | -6.66019 |
| C | -0.23102  | -2.39233 | -0.24681 |
| C | -0.49393  | -1.89206 | -1.65530 |
| H | 0.68487   | -2.99147 | -0.21276 |
| H | -0.12479  | -1.56055 | 0.45639  |
| C | -1.48233  | -0.73028 | -1.85679 |
| H | -0.67296  | -2.74662 | -2.32190 |
| O | 0.61545   | -1.08623 | -2.12158 |
| C | -0.28066  | -0.01799 | -2.53784 |
| H | -1.80061  | -0.25437 | -0.92556 |
| H | -2.35338  | -0.92766 | -2.48500 |
| C | 0.12617   | 1.34981  | -2.05646 |
| H | -0.37389  | -0.01364 | -3.63338 |
| C | -0.43206  | 2.49034  | -2.64939 |
| C | 1.02556   | 1.51397  | -0.99874 |
| C | -0.11182  | 3.76175  | -2.18114 |
| H | -1.12893  | 2.38235  | -3.47844 |
| C | 1.36303   | 2.78901  | -0.54367 |
| H | 1.47406   | 0.63464  | -0.54792 |
| C | 0.79787   | 3.92628  | -1.12792 |
| H | -0.56616  | 4.63548  | -2.64454 |
| H | 2.05644   | 2.91245  | 0.28197  |
| C | 1.18020   | 5.31222  | -0.67592 |
| C | 2.41745   | 5.98249  | -1.33748 |
| H | 0.29196   | 5.95954  | -0.67756 |
| O | 1.82613   | 5.34755  | 0.62684  |
| C | 2.96978   | 6.06406  | 0.09649  |
| H | 2.23927   | 6.94013  | -1.83335 |
| H | 2.97710   | 5.32408  | -2.00453 |
| C | 3.05557   | 7.44274  | 0.72920  |
| H | 3.90431   | 5.51695  | 0.27144  |
| O | 4.17996   | 8.09600  | 0.11219  |
| H | 3.20524   | 7.36710  | 1.81065  |
| H | 2.14197   | 8.02009  | 0.55317  |
| C | 4.49608   | 9.32776  | 0.51819  |
| N | 3.76779   | 9.89344  | 1.48394  |
| N | 5.54343   | 9.86147  | -0.11715 |
| C | 4.18031   | 11.12222 | 1.80730  |
| C | 5.84105   | 11.08789 | 0.30334  |
| N | 5.20459   | 11.78254 | 1.26031  |
| O | 3.46763   | 11.70595 | 2.77181  |
| O | 6.88067   | 11.64992 | -0.31576 |
| C | 3.85984   | 13.03206 | 3.19741  |

|   |          |          |          |
|---|----------|----------|----------|
| C | 7.28534  | 12.97545 | 0.09632  |
| C | 2.97480  | 13.41294 | 4.34334  |
| H | 3.76691  | 13.73112 | 2.36025  |
| H | 4.91513  | 13.00320 | 3.49431  |
| C | 8.50898  | 13.33241 | -0.68950 |
| H | 7.48996  | 12.95785 | 1.17373  |
| H | 6.46892  | 13.68363 | -0.07741 |
| C | 2.28676  | 14.55212 | 4.40019  |
| H | 2.94124  | 12.70428 | 5.16960  |
| C | 8.64191  | 14.46584 | -1.37653 |
| H | 9.32351  | 12.61080 | -0.64817 |
| H | 1.68777  | 14.81421 | 5.26765  |
| H | 2.29910  | 15.27075 | 3.58323  |
| H | 7.83756  | 15.19606 | -1.43795 |
| H | 9.56112  | 14.71122 | -1.90075 |
| C | 1.63515  | -3.30408 | 3.89192  |
| C | 2.55111  | -3.36762 | 5.10031  |
| H | 1.34154  | -2.26964 | 3.68440  |
| H | 2.12529  | -3.70755 | 3.00052  |
| C | 3.39627  | -4.63333 | 5.32555  |
| H | 2.00487  | -3.03504 | 5.99336  |
| O | 3.73589  | -2.56376 | 4.87986  |
| C | 4.60543  | -3.65804 | 5.28377  |
| H | 3.37273  | -5.33600 | 4.48840  |
| H | 3.23576  | -5.17224 | 6.26157  |
| C | 5.73348  | -3.93382 | 4.32465  |
| H | 5.01051  | -3.46335 | 6.28726  |
| C | 6.82579  | -4.70801 | 4.73825  |
| C | 5.70197  | -3.46555 | 3.00744  |
| C | 7.85057  | -5.02105 | 3.84904  |
| H | 6.87056  | -5.07623 | 5.76147  |
| C | 6.73877  | -3.76210 | 2.12256  |
| H | 4.86710  | -2.85068 | 2.68727  |
| C | 7.82380  | -4.54311 | 2.53214  |
| H | 8.68379  | -5.63590 | 4.18406  |
| H | 6.70591  | -3.40431 | 1.09842  |
| C | 8.97189  | -4.83762 | 1.60162  |
| C | 10.11712 | -3.79085 | 1.49645  |
| H | 9.34032  | -5.85740 | 1.78073  |
| O | 8.64667  | -4.65939 | 0.19490  |
| C | 9.75830  | -3.74894 | 0.00053  |
| H | 11.12130 | -4.15100 | 1.73461  |
| H | 9.92374  | -2.86301 | 2.03810  |
| C | 10.75656 | -4.35324 | -0.97226 |

|   |          |          |          |
|---|----------|----------|----------|
| H | 9.42001  | -2.77480 | -0.37365 |
| O | 11.83123 | -3.40256 | -1.08666 |
| H | 10.29314 | -4.52251 | -1.94920 |
| H | 11.13956 | -5.31230 | -0.60843 |
| C | 12.83628 | -3.68410 | -1.91897 |
| N | 12.80144 | -4.82963 | -2.60433 |
| N | 13.78805 | -2.74735 | -1.96541 |
| C | 13.85594 | -4.99899 | -3.40671 |
| C | 14.77671 | -3.04720 | -2.80343 |
| N | 14.87951 | -4.15401 | -3.55700 |
| O | 13.84146 | -6.13715 | -4.10195 |
| O | 15.74475 | -2.13151 | -2.87026 |
| C | 14.93619 | -6.38891 | -5.01395 |
| C | 16.84524 | -2.36696 | -3.77795 |
| C | 14.63439 | -7.66772 | -5.73163 |
| H | 15.87615 | -6.44641 | -4.45603 |
| H | 15.00998 | -5.54363 | -5.70870 |
| C | 17.73465 | -1.16360 | -3.72226 |
| H | 16.43893 | -2.52093 | -4.78503 |
| H | 17.37656 | -3.27928 | -3.48878 |
| C | 15.48688 | -8.68788 | -5.81504 |
| H | 13.66400 | -7.71551 | -6.22362 |
| C | 19.04935 | -1.22494 | -3.51686 |
| H | 17.24444 | -0.20605 | -3.89167 |
| H | 15.25040 | -9.58441 | -6.38096 |
| H | 16.45797 | -8.66478 | -5.32470 |
| H | 19.55743 | -2.17017 | -3.33698 |
| H | 19.67064 | -0.33393 | -3.52521 |

Ground state geometry for LCPO-2, B3LYP/6-31G(d) level of theory.

183

LCPO-2.log Energy: -3154344.1211523

|   |         |         |          |
|---|---------|---------|----------|
| C | 1.62821 | 2.24357 | 1.26442  |
| N | 1.66918 | 3.59080 | 1.51441  |
| C | 1.59987 | 4.48620 | 0.47782  |
| C | 1.45687 | 2.68521 | -1.06583 |
| N | 1.60178 | 1.79224 | -0.03303 |
| N | 1.41314 | 4.03787 | -0.81100 |
| O | 1.68427 | 5.77552 | 0.69868  |
| O | 1.63001 | 1.37503 | 2.24649  |
| O | 1.44091 | 2.27996 | -2.31500 |
| C | 0.32154 | 1.44370 | -2.75422 |
| C | 0.80980 | 0.69294 | -3.97761 |

|   |          |           |          |
|---|----------|-----------|----------|
| H | -0.51424 | 2.10517   | -3.00319 |
| H | 0.04986  | 0.75234   | -1.95585 |
| C | 1.72190  | -0.52527  | -3.75452 |
| H | 1.17592  | 1.40614   | -4.72828 |
| O | -0.25121 | -0.13599  | -4.50790 |
| C | 0.60592  | -1.31425  | -4.49531 |
| H | 1.84349  | -0.79303  | -2.70311 |
| H | 2.69663  | -0.49810  | -4.24618 |
| C | -0.00794 | -2.51581  | -3.82561 |
| H | 0.89609  | -1.57215  | -5.52370 |
| C | 0.55661  | -3.78303  | -4.02237 |
| C | -1.11297 | -2.39702  | -2.97717 |
| C | 0.03927  | -4.89922  | -3.37012 |
| H | 1.41391  | -3.89613  | -4.68328 |
| C | -1.64343 | -3.51840  | -2.33961 |
| H | -1.56465 | -1.42091  | -2.83379 |
| C | -1.07385 | -4.78155  | -2.52750 |
| H | 0.50023  | -5.87315  | -3.52350 |
| H | -2.49434 | -3.41903  | -1.67313 |
| C | -1.66169 | -6.00822  | -1.88029 |
| C | -2.87108 | -6.69709  | -2.57442 |
| H | -0.85763 | -6.71291  | -1.62602 |
| O | -2.47027 | -5.72108  | -0.70481 |
| C | -3.60520 | -6.44286  | -1.24587 |
| H | -2.73489 | -7.74587  | -2.85083 |
| H | -3.26768 | -6.14331  | -3.42749 |
| C | -3.91075 | -7.65227  | -0.37850 |
| H | -4.49387 | -5.80333  | -1.31402 |
| O | -5.04205 | -8.30341  | -0.98499 |
| H | -4.15301 | -7.34523  | 0.64389  |
| H | -3.05925 | -8.33884  | -0.33324 |
| C | -5.52037 | -9.40771  | -0.40739 |
| N | -4.92565 | -9.86527  | 0.69719  |
| N | -6.57685 | -9.93751  | -1.03086 |
| C | -5.49260 | -10.97288 | 1.18366  |
| C | -7.03853 | -11.03490 | -0.43737 |
| N | -6.54770 | -11.61211 | 0.67137  |
| O | -4.91206 | -11.44995 | 2.28550  |
| O | -8.09413 | -11.58818 | -1.03705 |
| C | -5.47651 | -12.63748 | 2.88975  |
| C | -8.67244 | -12.77329 | -0.44383 |
| C | -4.69588 | -12.91852 | 4.13599  |
| H | -5.42866 | -13.47089 | 2.18185  |
| H | -6.53355 | -12.44515 | 3.10989  |

|   |           |           |          |
|---|-----------|-----------|----------|
| C | -9.88220  | -13.13066 | -1.25065 |
| H | -8.93447  | -12.54925 | 0.59732  |
| H | -7.93491  | -13.58217 | -0.43653 |
| C | -4.14757  | -14.10037 | 4.41352  |
| H | -4.61881  | -12.09272 | 4.84172  |
| C | -10.10272 | -14.34367 | -1.75491 |
| H | -10.61114 | -12.33315 | -1.38687 |
| H | -3.62345  | -14.28133 | 5.34760  |
| H | -4.20603  | -14.93608 | 3.71912  |
| H | -9.38366  | -15.15193 | -1.63814 |
| H | -11.01232 | -14.57854 | -2.30029 |
| C | 0.57078   | 6.43297   | 1.38846  |
| C | 0.48618   | 7.83652   | 0.81506  |
| H | 0.77925   | 6.43152   | 2.45963  |
| H | -0.35357  | 5.88146   | 1.19229  |
| C | -0.07548  | 7.97677   | -0.60933 |
| H | 1.42626   | 8.37107   | 1.00137  |
| O | -0.64538  | 8.53360   | 1.38966  |
| C | -1.24908  | 8.72752   | 0.07849  |
| H | -0.32904  | 7.03373   | -1.09772 |
| H | 0.52907   | 8.58103   | -1.28846 |
| C | -2.63634  | 8.14562   | -0.04731 |
| H | -1.27177  | 9.79922   | -0.16278 |
| C | -3.33072  | 8.27055   | -1.25903 |
| C | -3.24704  | 7.46775   | 1.01086  |
| C | -4.59802  | 7.71556   | -1.40915 |
| H | -2.87089  | 8.79343   | -2.09550 |
| C | -4.52562  | 6.92558   | 0.86461  |
| H | -2.71595  | 7.37646   | 1.95265  |
| C | -5.21475  | 7.04244   | -0.34505 |
| H | -5.11488  | 7.80677   | -2.36263 |
| H | -4.99192  | 6.38969   | 1.68518  |
| C | -6.60835  | 6.49371   | -0.50969 |
| C | -7.80687  | 7.39080   | -0.08935 |
| H | -6.72346  | 6.07544   | -1.51951 |
| O | -6.96948  | 5.50040   | 0.49027  |
| C | -8.16539  | 6.23295   | 0.85874  |
| H | -8.54005  | 7.61278   | -0.86909 |
| H | -7.51551  | 8.31576   | 0.41192  |
| C | -9.39828  | 5.41288   | 0.51878  |
| H | -8.17058  | 6.48425   | 1.92653  |
| O | -10.53127 | 6.22111   | 0.88603  |
| H | -9.40519  | 4.47171   | 1.07731  |
| H | -9.43710  | 5.17311   | -0.54884 |

|   |           |          |          |
|---|-----------|----------|----------|
| C | -11.75280 | 5.71157  | 0.71087  |
| N | -11.86953 | 4.47868  | 0.21171  |
| N | -12.74463 | 6.53086  | 1.07203  |
| C | -13.13720 | 4.07622  | 0.08565  |
| C | -13.95194 | 6.00229  | 0.89067  |
| N | -14.22638 | 4.78174  | 0.40246  |
| O | -13.27721 | 2.84674  | -0.41150 |
| O | -14.96438 | 6.79864  | 1.23798  |
| C | -14.61820 | 2.32376  | -0.56099 |
| C | -16.31133 | 6.29361  | 1.09122  |
| C | -14.49561 | 0.91369  | -1.04900 |
| H | -15.18296 | 2.94951  | -1.25921 |
| H | -15.11947 | 2.37201  | 0.41321  |
| C | -17.24105 | 7.34734  | 1.60843  |
| H | -16.39844 | 5.36278  | 1.66490  |
| H | -16.50707 | 6.05825  | 0.04031  |
| C | -15.13656 | 0.44291  | -2.11762 |
| H | -13.85912 | 0.26119  | -0.45310 |
| C | -18.28441 | 7.81311  | 0.92375  |
| H | -17.03387 | 7.70694  | 2.61523  |
| H | -15.05697 | -0.59786 | -2.41827 |
| H | -15.77071 | 1.07910  | -2.73171 |
| H | -18.50407 | 7.47384  | -0.08649 |
| H | -18.96297 | 8.54819  | 1.34707  |
| C | 2.85770   | 1.22111  | 3.03226  |
| C | 2.91305   | -0.23889 | 3.44603  |
| H | 2.80615   | 1.89685  | 3.88761  |
| H | 3.72086   | 1.47798  | 2.41100  |
| C | 3.26612   | -1.26044 | 2.35246  |
| H | 2.03163   | -0.48758 | 4.05049  |
| O | 4.14218   | -0.50065 | 4.16533  |
| C | 4.55379   | -1.49885 | 3.18838  |
| H | 3.41244   | -0.83460 | 1.35777  |
| H | 2.59165   | -2.11585 | 2.28105  |
| C | 5.88664   | -1.20646 | 2.54263  |
| H | 4.57904   | -2.49019 | 3.66166  |
| C | 6.39352   | -2.08354 | 1.57310  |
| C | 6.63005   | -0.07145 | 2.87648  |
| C | 7.60663   | -1.81946 | 0.94440  |
| H | 5.82845   | -2.97205 | 1.29770  |
| C | 7.85493   | 0.18427  | 2.25657  |
| H | 6.24486   | 0.60618  | 3.63134  |
| C | 8.35685   | -0.68491 | 1.28470  |
| H | 7.97559   | -2.50217 | 0.18125  |

|   |          |          |          |
|---|----------|----------|----------|
| H | 8.42183  | 1.07455  | 2.50962  |
| C | 9.69188  | -0.44322 | 0.62954  |
| C | 10.96827 | -0.97922 | 1.33793  |
| H | 9.64100  | -0.73165 | -0.42972 |
| O | 10.16789 | 0.92586  | 0.75531  |
| C | 11.42994 | 0.48882  | 1.31889  |
| H | 11.58055 | -1.67928 | 0.76353  |
| H | 10.78500 | -1.38582 | 2.33439  |
| C | 12.56539 | 0.84774  | 0.37551  |
| H | 11.60846 | 0.93888  | 2.30329  |
| O | 13.77380 | 0.36901  | 0.99580  |
| H | 12.61963 | 1.93087  | 0.22749  |
| H | 12.43539 | 0.37897  | -0.60513 |
| C | 14.92610 | 0.56147  | 0.34897  |
| N | 14.91490 | 1.18017  | -0.82590 |
| N | 16.00108 | 0.08395  | 0.99620  |
| C | 16.13637 | 1.30802  | -1.37165 |
| C | 17.14087 | 0.28080  | 0.33930  |
| N | 17.28455 | 0.88499  | -0.85160 |
| O | 16.13961 | 1.92473  | -2.55289 |
| O | 18.28587 | -0.14489 | 0.87299  |
| C | 17.41875 | 2.12294  | -3.20378 |
| C | 18.21941 | -0.82384 | 2.15101  |
| C | 17.16440 | 2.89981  | -4.45785 |
| H | 17.88179 | 1.15293  | -3.40884 |
| H | 18.07620 | 2.66641  | -2.51502 |
| C | 19.60552 | -1.27859 | 2.48671  |
| H | 17.52590 | -1.66790 | 2.05823  |
| H | 17.81616 | -0.14441 | 2.90811  |
| C | 17.60185 | 2.52714  | -5.65964 |
| H | 16.61219 | 3.83037  | -4.33415 |
| C | 20.20728 | -1.02211 | 3.64719  |
| H | 20.10540 | -1.87471 | 1.72446  |
| H | 17.43629 | 3.13827  | -6.54237 |
| H | 18.14929 | 1.59839  | -5.80682 |
| H | 19.72950 | -0.42324 | 4.41980  |
| H | 21.19805 | -1.40579 | 3.87360  |
| O | 1.23081  | 4.86573  | -1.76345 |
| O | 1.76758  | 4.01463  | 2.72166  |
| O | 1.67351  | 0.53341  | -0.28071 |

## 7.References

- S1. M. J. Frisch, *et al.* Gaussian 09 Revision D.01 (2009). Gaussian Inc. Wallingford CT 2009.
- S2. C. Lee, W. Yang and R. G. Parr, *Phys. Rev. B* 1988, **37**, 785-789.
- S3. P. J. Stephens, F. J. Devlin, C. F. Chabalowski and M. J. Frisch, *J. Phys. Chem.*, 1994, **98**, 11623-11627.
- S4. S. M. Bouzzine, S. Bouzakraoui, M. Bouachrine and M. Hamidi, *J. Mol. Struct. THEOCHEM* 2005, **726**, 271-276.
- S5. J. Wang, F. Q. Bai, B. H. Xia, H. X. Zhang and T. Cui, *J. Mol. Model.* 2014, **20**, 1-8.
